# Supplementary material for: Targeted Metabolomics Identifies Reliable and Stable Metabolites in Human Serum and Plasma Samples
Source: PLoS One. 2014 Feb 24;9(2):e89728. doi: 10.1371/journal.pone.0089728 (PMC3933650; doi:10.1371/journal.pone.0089728)
Supplement: Table S2 — Within-and between plates CV. CVs are calculated on the basis of multiple reference samples on each plate. (XLS) [file pone.0089728.s019.xls]

## Sheet: Tabelle1
Table S2. Within-and between plates CV.
CVs are calculated on the basis of multiple reference samples on each plate.
Metabolite	WCV [%]	BCV [%]
C0	6.23753	0.000154023
C10	9.92372	0.000245973
C10:1	10.0502	0.000248806
C10:2	11.1837	0.000385549
C12	19.3659	0.000482769
C14*	30.1978	0.000768017
C14:1	19.1064	0.000492662
C14:1-OH*	38.9946	0.00143454
C14:2	22.2932	0.000560758
C14:2-OH*	32.2111	0.0011603
C16	14.2502	0.000353183
C16:2*	47.6881	0.0018269
C18*	37.2132	0.000936305
C18:1	14.5839	0.00036492
C18:2	15.6307	0.000391628
C2	6.45625	5.86768e-05
C3	8.46605	0.00015022
C3-OH	16.3817	0.000405256
C4	7.7248	0.000191877
C4:1	18.2617	0.000637702
C5	12.4033	0.000308412
C5:1	17.4984	0.000435609
C5:1-DC*	43.3478	0.00114289
C6 (C4:1-DC)	17.3281	0.000431093
C7-DC*	26.2919	0.000662324
C8	10.368	0.000257419
C9*	24.4471	0.000624667
Ala	4.99634	0.000172177
Arg	6.7974	0.000167935
Asn	10.2586	0.000254626
Asp	10.3511	0.000256439
Cit	10.4066	0.000258951
Gln	9.38849	0.000323981
Glu	9.37905	0.000323783
Gly	9.24366	0.000318902
His	7.45026	0.000184112
Ile	7.04297	0.000174002
Leu	10.721	0.000374849
Lys	10.316	0.000356358
Met	10.4879	0.000259323
Orn	8.64193	0.00021366
Phe	7.27495	0.000179827
Pro	5.03466	0.000173507
Ser	16.25	0.000574501
Thr	7.96931	0.000274664
Trp	8.64589	0.000213879
Tyr	8.29775	0.0002051
Val	7.41665	0.000255781
Acetylornithine	17.7982	0.000163905
ADMA	17.558	0.000225357
alpha-AAA	16.8902	4.20961e-05
Creatinine	6.37377	0.000157699
Kynurenine	13.9418	0.000127148
Met-SO	12.6957	5.94865e-05
Putrescine*	56.85	0.00169083
Sarcosine	13.3068	0.000236424
SDMA*	49.438	0.000315226
Serotonin*	151.927	0.00301698
Spermidine*	26.0715	0.000472763
Taurine	23.1857	0.000808366
total DMA	14.7035	0.000134187
lysoPC a C16:0	5.04256	0.000173892
lysoPC a C16:1	7.22212	6.58946e-05
lysoPC a C17:0	6.80761	6.1987e-05
lysoPC a C18:0	4.82935	0.000119316
lysoPC a C18:1	5.58315	0.000138002
lysoPC a C18:2	5.44272	0.000134603
lysoPC a C20:3	7.0526	6.4222e-05
lysoPC a C20:4	4.58566	8.12156e-05
lysoPC a C28:0	17.8621	0.000317053
lysoPC a C28:1	12.8125	0.000227212
PC aa C24:0*	47.4355	0.000889543
PC aa C28:1	6.02047	7.64041e-05
PC aa C30:0	6.01057	7.62723e-05
PC aa C32:0	8.40687	0.000150028
PC aa C32:1	9.67685	0.000124564
PC aa C32:2	7.00017	6.42965e-05
PC aa C32:3	10.3598	0.000183792
PC aa C34:1	5.00205	0.000123527
PC aa C34:2	4.57411	0.000157604
PC aa C34:3	5.04885	8.93448e-05
PC aa C34:4	7.26995	9.2408e-05
PC aa C36:0	9.56179	4.47615e-05
PC aa C36:1	5.17989	0.000127957
PC aa C36:2	4.69632	0.000161874
PC aa C36:3	5.56721	0.000137648
PC aa C36:4	4.92214	0.000169635
PC aa C36:5	4.76051	8.42403e-05
PC aa C36:6	9.05077	0.000160395
PC aa C38:0	5.22831	6.62912e-05
PC aa C38:1*	38.4194	0.00039566
PC aa C38:3	4.86284	0.000120061
PC aa C38:4	4.66692	0.000115224
PC aa C38:5	5.10513	0.000126045
PC aa C38:6	4.85817	0.000119985
PC aa C40:1	9.99513	0.000177224
PC aa C40:2	15.8542	0.000282158
PC aa C40:3	9.47139	0.000168186
PC aa C40:4	5.37745	2.50893e-05
PC aa C40:5	4.6317	5.87275e-05
PC aa C40:6	5.00735	8.86289e-05
PC aa C42:0	8.20959	0.000145513
PC aa C42:1	15.6259	0.000279567
PC aa C42:2	13.9262	0.000344702
PC aa C42:4	15.0057	0.000374629
PC aa C42:5	10.3524	0.000183594
PC aa C42:6	9.20511	0.000163105
PC ae C30:0	11.4519	0.000283151
PC ae C30:1*	132.751	0.00308258
PC ae C32:1	6.59613	5.99851e-05
PC ae C32:2	7.28271	0.000129199
PC ae C34:0	7.52708	0.000133228
PC ae C34:1	6.1663	5.60719e-05
PC ae C34:2	4.81781	6.10881e-05
PC ae C34:3	4.36589	3.96659e-05
PC ae C36:0	11.9616	0.000214055
PC ae C36:1	5.11406	6.48554e-05
PC ae C36:2	5.09285	6.45755e-05
PC ae C36:3	6.08647	7.72166e-05
PC ae C36:4	4.8876	8.64876e-05
PC ae C36:5	4.79002	8.4755e-05
PC ae C38:0	6.95272	8.82933e-05
PC ae C38:1	10.6484	9.72291e-05
PC ae C38:2	8.0017	1.91981e-05
PC ae C38:3	5.58039	7.07932e-05
PC ae C38:4	5.53763	9.79925e-05
PC ae C38:5	5.11565	9.0509e-05
PC ae C38:6	5.43449	4.94021e-05
PC ae C40:1	10.5149	9.65093e-05
PC ae C40:2	7.03592	8.93406e-05
PC ae C40:3	5.13564	2.3976e-05
PC ae C40:4	5.231	1.74942e-05
PC ae C40:5	4.95628	4.50417e-05
PC ae C40:6	5.87515	1.9654e-05
PC ae C42:0	11.1972	0.00019984
PC ae C42:1	6.74726	0.000119493
PC ae C42:2	10.0901	0.000179175
PC ae C42:3	10.2664	0.000182006
PC ae C42:4	6.85698	0.000121395
PC ae C42:5	5.52067	5.01594e-05
PC ae C44:3	20.57	0.000516377
PC ae C44:4	10.3099	0.000255615
PC ae C44:5	8.0825	0.000102623
PC ae C44:6	6.41735	0.000113639
SM (OH) C14:1	5.59106	5.08051e-05
SM (OH) C16:1	5.8747	3.87637e-05
SM (OH) C22:1	5.83269	0.000103267
SM (OH) C22:2	5.92205	7.51795e-05
SM (OH) C24:1	11.1513	0.000141546
SM C16:0	5.18477	0.000128043
SM C16:1	4.06294	7.18947e-05
SM C18:0	4.99549	8.84168e-05
SM C18:1	5.37579	9.51401e-05
SM C20:2	12.6958	0.000225199
SM C24:0	5.47385	9.69373e-05
SM C24:1	5.46737	0.000135002
SM C26:0*	42.9728	0.00320888
SM C26:1	22.6486	0.000414817
Hexose	4.1383	0.000142562
